# Supplementary material
Source: PubMed Central journal article supplement (PMC5586367)
Supplement: 129FigureS1.pdf [file 129FigureS1.pdf]

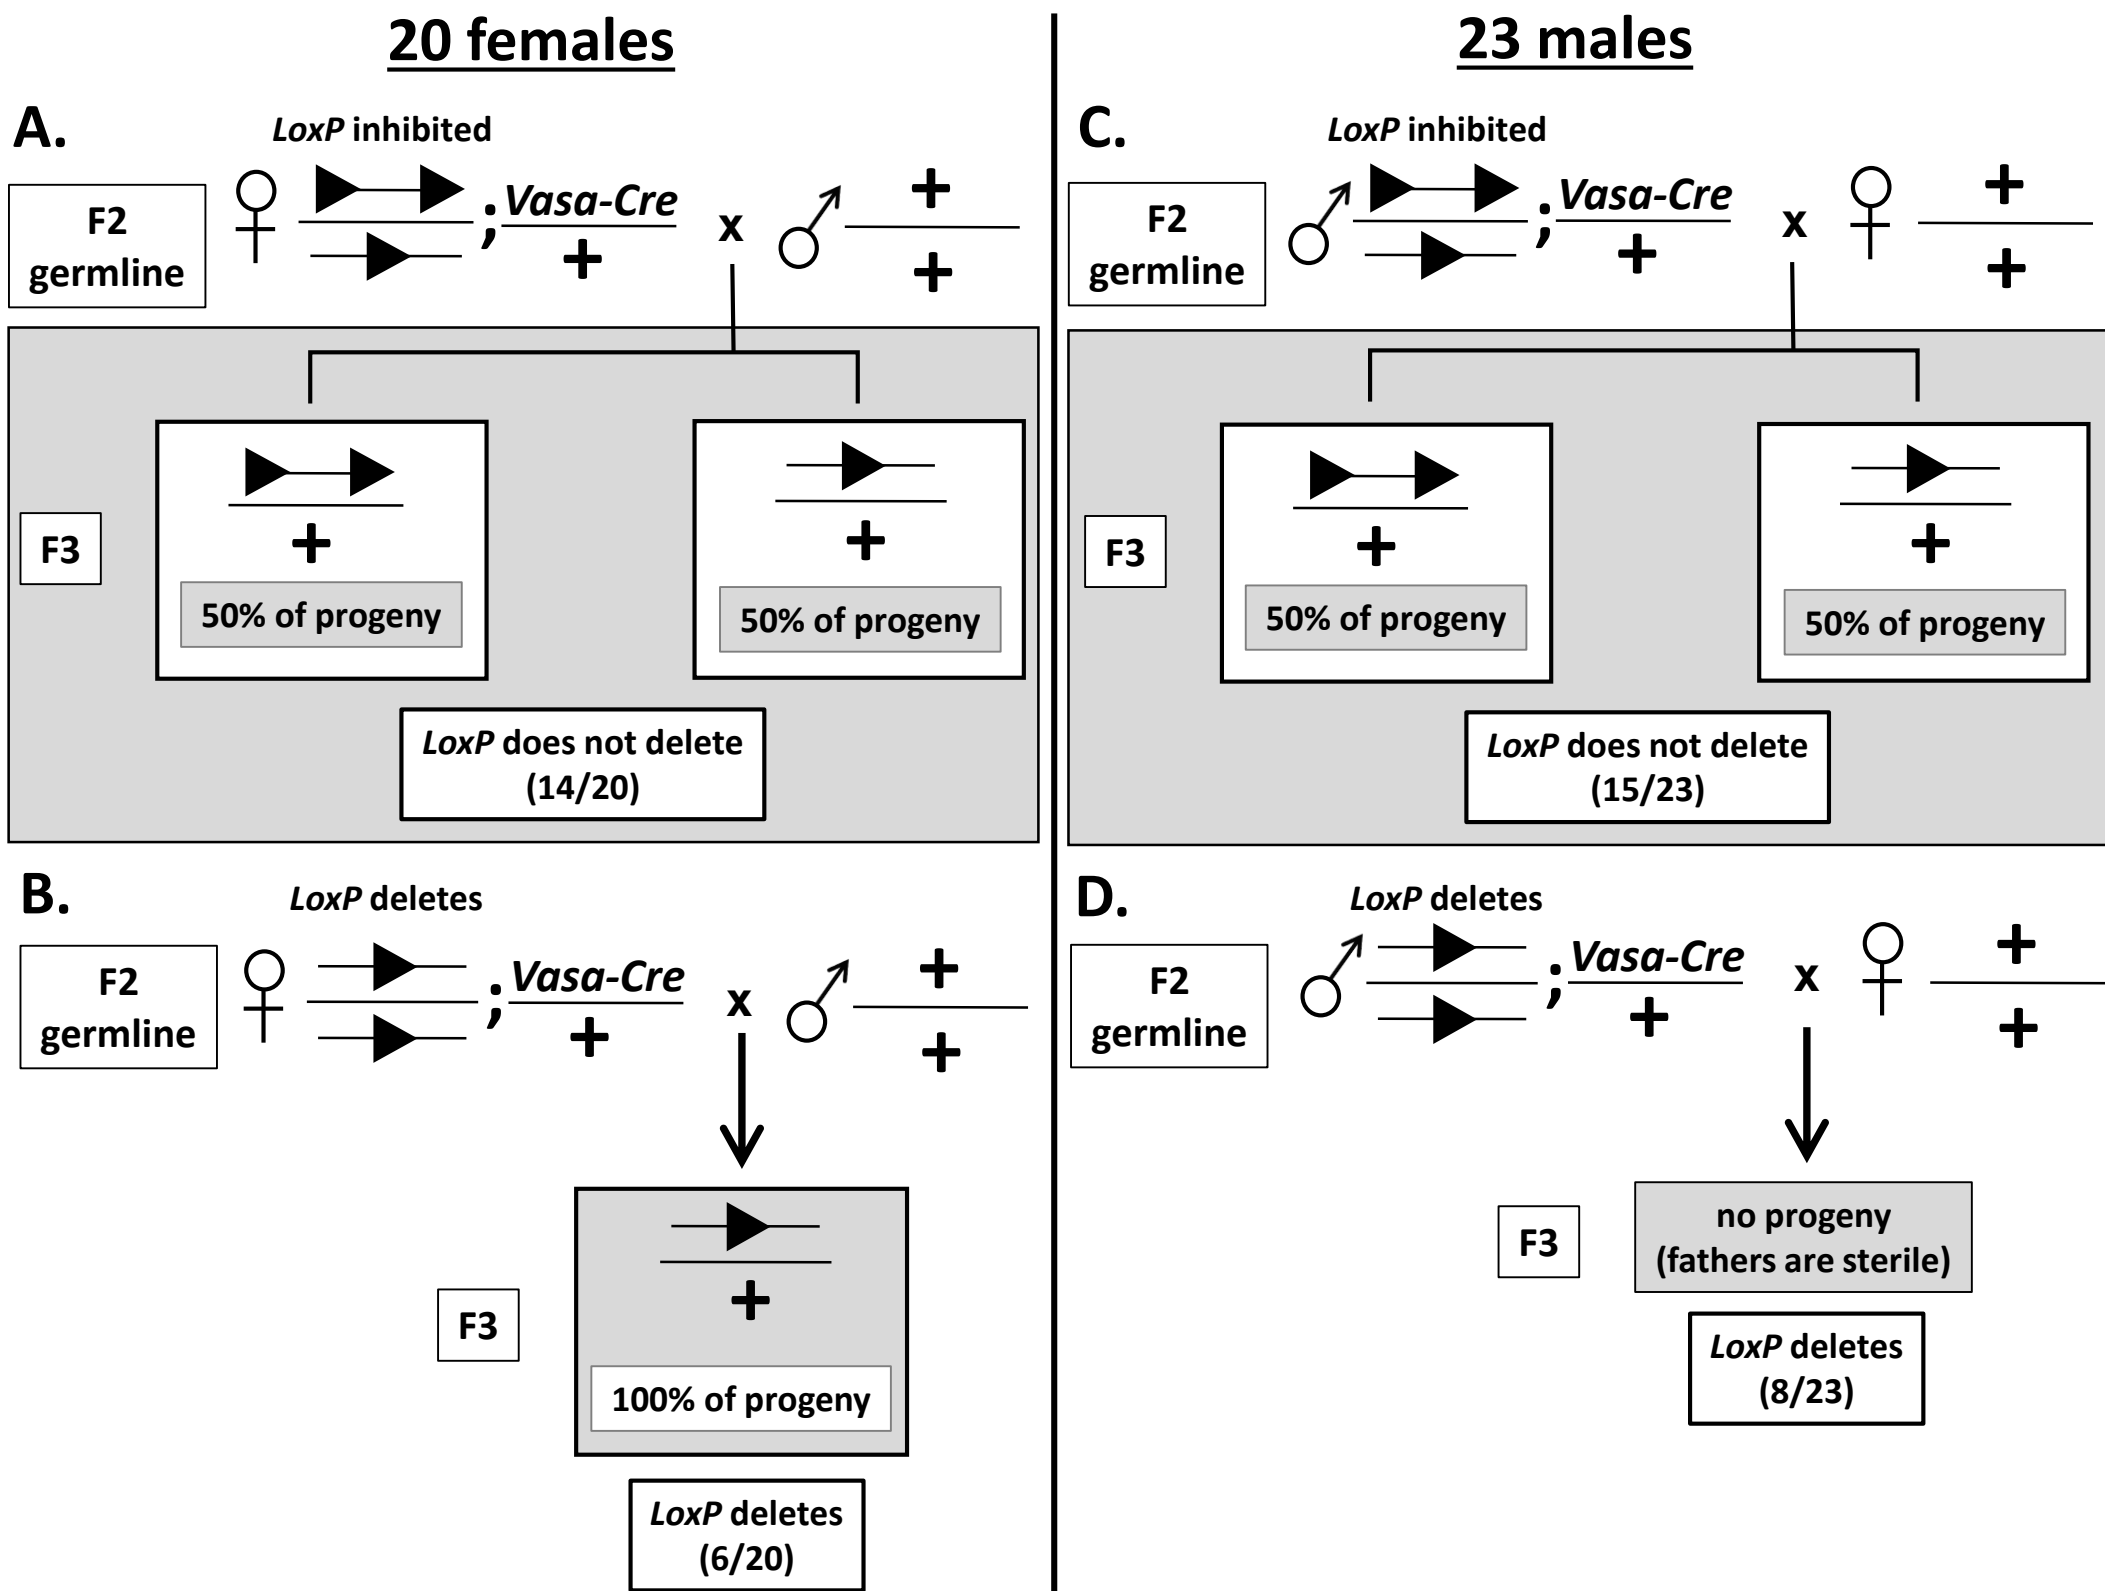

**Supplemental Figure 1.** Determining the genotype of the F2 germline. Supplemental Figure 1 details the germ cell outcomes from Figure 1B. In the original cross, 20 female (A,B) and 23 male (C,D) F2 animals were mated to determine whether the *Kdm1a* floxed allele deleted in the germline. In 14 females *LoxP* recombination is inhibited, and the *LoxP* does not delete (A), while in 6 females the *LoxP* deletes (B). In 15 males, *LoxP* recombination is inhibited, and the *LoxP* does not delete (C), while in 8 males the *LoxP* deletes, resulting in sterility (D). The genotype of the F3 germline in the extra cross (Figure 3A) was scored in an identical fashion. The genotype of the F2 germline in the heterologous cross (Figure 3B) was assessed in F3 animals using a similar mating scheme as depicted here (see methods for details).
