# Supplementary material
Source: PubMed Central journal article supplement (PMC5586367)
Supplement: 129FigureS2.pdf [file 129FigureS2.pdf]

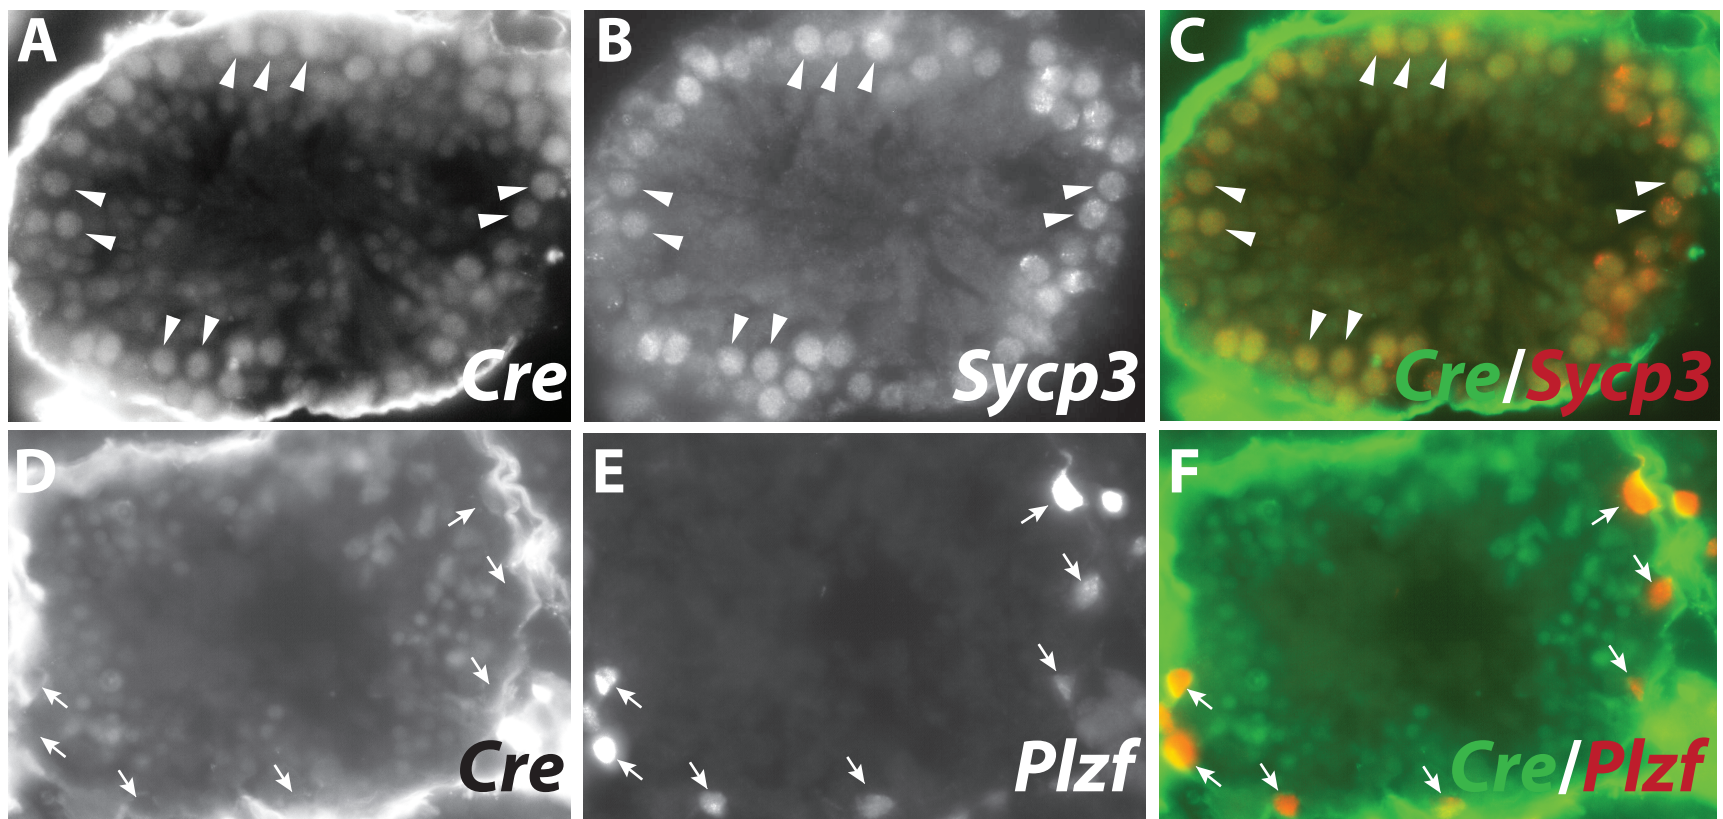

**Supplemental Figure 2.** Vasa-Cre is expressed normally in inhibited F2 testes. Representative VASA-CRE (A), SYCP3 Synaptonemal Complex 3 meiotic marker (B), and merge (C) immunofluorescence showing CRE protein is present normally in XX and XX spermatocytes (arrowheads). Representative VASA-CRE (D), PLZF spermatogonial stem cell marker (E), and merge (F) immunofluorescence showing CRE protein is absent in spermatogonial stem cells (arrows).
