# Supplementary material
Source: PubMed Central journal article supplement (PMC5586367)
Supplement: 129FigureS3.pdf [file 129FigureS3.pdf]

## Replicate 1

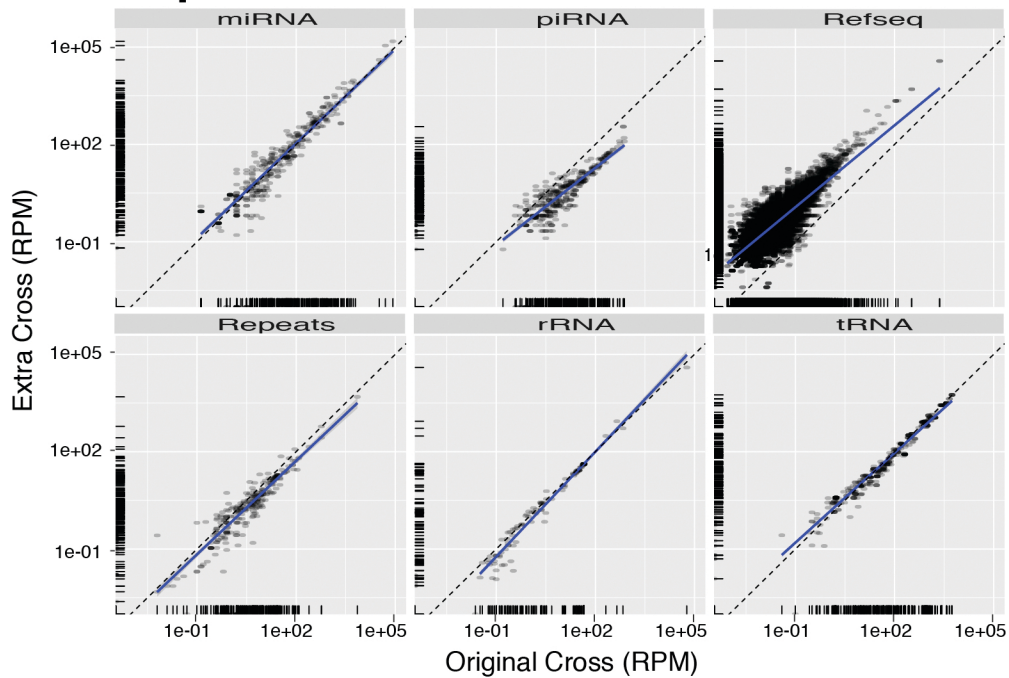

## Replicate 2

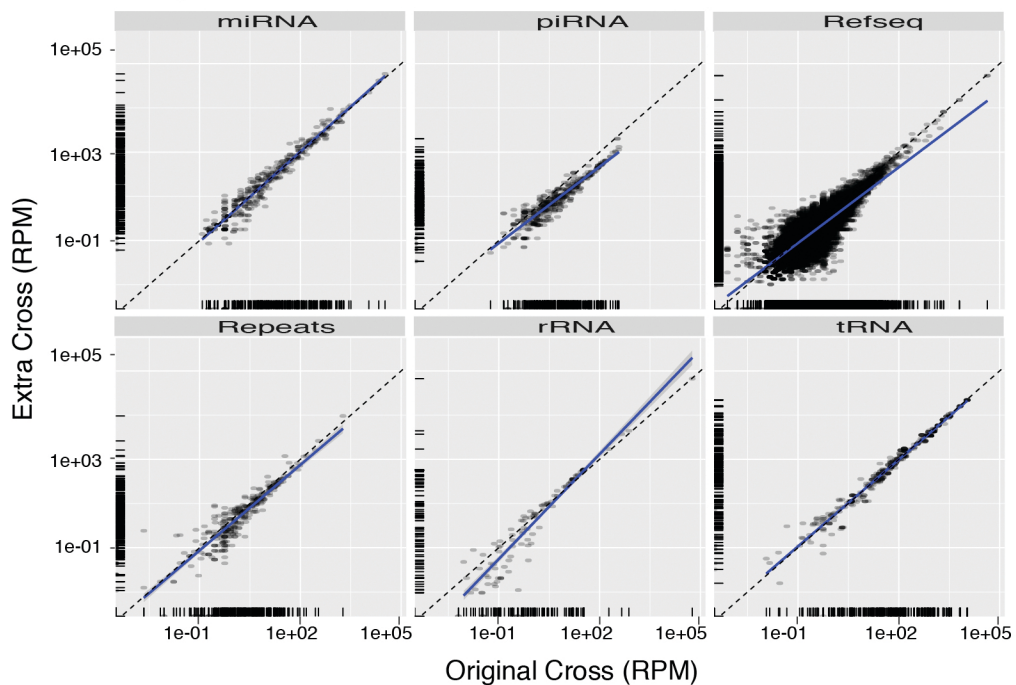

**Supplemental Figure 3.** No small RNA classes are enriched in either original cross or extra cross sperm. Scatter plots from two biological replicates comparing transcript levels in F1 extra cross sperm and F1 original cross sperm for the following small RNA gene classes: micro RNA, PIWI-interacting RNA, ribosomal RNA, tRNAs, repeats (transposons and other repetitive sequences), and Refseq (small RNAs that did not map to other categories).
