# Supplementary material
Source: PubMed Central journal article supplement (PMC5586367)
Supplement: 129FigureS4.pdf [file 129FigureS4.pdf]

### A. F0 floxed

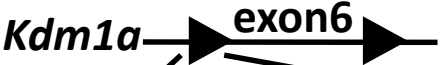

ATAATTTCTGATAGTATATATTATACGAAGTTAT  
 ATAATTTCTGATAGTATATATTATACGAAGTTAT

### B. F1 deleted

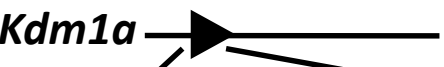

ATAACTTCTGATAGTATATATTATACGAAGTTAT  
 ATAATTTCTGATAGTATATATTATACGAAGTTAT  
 ATAACTTCTGATAGTATATATTATACGAAGTTAT  
 ATAATTTCTGATAGTATATATTATACGAAGTTAT  
 ATAATTTCTGATAGTATATATTATACGAAGTTAT  
 ATAATTTCTGATAGTATATATTATACGAAGTTAT  
 ATAATTTCTGATAGTATATATTATACGAAGTTAT  
 ATAACTTCTGATAGTATATATTATACGAAGTTAT  
 ATAACTTCTGATAGTATATATTATACGAAGTTAT  
 ATAACTTCTGATAGTATATATTATACGAAGTTAT  
 ATAATTTCTGATAGTATATATTATACGAAGTTAT

### C. F2 floxed

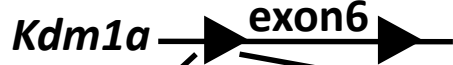

ATAACTTCTGATAGTATATATTATACGAAGTTAT  
 ATAACTTCTGATAGTATATATTATACGAAGTTAT  
 ATAATTTCTGATAGTATATATTATACGAAGTTAT  
 ATAATTTCTGATAGTATATATTATACGAAGTTAT  
 ATAACTTCTGATAGTATATATTATACGAAGTTAT  
 ATAATTTCTGATAGTATATATTATACGAAGTTAT  
 ATAATTTCTGATAGTATATATTATACGAAGTTAT  
 ATAATTTCTGATAGTATATATTATACGAAGTTAT  
 ATAACTTCTGATAGTATATATTATACGAAGTTAT  
 ATAACTTCTGATAGTATATATTATACGAAGTTAT  
 ATAACTTCTGATAGTATATATTATACGAAGTTAT  
 ATAATTTCTGATAGTATATATTATACGAAGTTAT  
 ATAATTTCTGATAGTATATATTATACGAAGTTAT  
 ATAATTTCTGATAGTATATATTATACGAAGTTAT  
 ATAATTTCTGATAGTATATATTATACGAAGTTAT

**Supplemental Figure 4.** Non-CpG methylation of the *LoxP* recognition site. Bisulfite converted sequence from (A) the F0 *Kdm1a* floxed allele prior to recombination, (B) the F1 *Kdm1a* deleted allele after recombination, and (C) the F2 *Kdm1a* floxed allele that does not recombine. The methylated non-CpG cytosine just 5' of the CpG (denoted by the line above) in the *LoxP* site is shown in red. The sequences are depicted in the same order as the lollipop representations in Figure 5.
